# Supplementary material for: A Radiomics-Based Model for Potentially More Accurate Identification of Subtypes of Breast Cancer Brain Metastases
Source: PubMed Central journal article supplement — Yonsei Med J. 2023 Aug 18;64(9):573–80. doi: 10.3349/ymj.2023.0047 (PMC10462808; doi:10.3349/ymj.2023.0047), 2023-08-18
Supplement: ymj-64-573-s001.pdf [file ymj-64-573-s001.pdf]

**Supplementary Table 1.** Correct Classification Rate for Each Subtype in the External Validation Set

| <b>Target subtype</b> | <b>Non-conversion model</b> | <b>Radiomics-based model</b> | <b><i>p</i> value</b> |
|-----------------------|-----------------------------|------------------------------|-----------------------|
| HR+/HER2-             | 1.000 (1.000–1.000)         | 1.000 (1.000–1.000)          | >0.999                |
| HR+/HER2+             | 0.333 (0.000–0.711)         | 0.500 (0.100–0.900)          | 0.273                 |
| HR-/HER2+             | 0.529 (0.292–0.767)         | 0.882 (0.729–1.000)          | 0.002                 |
| Triple negative       | 1.000 (1.000–1.000)         | 1.000 (1.000–1.000)          | >0.999                |

HR, hormone receptor; HER2, human epidermal growth factor receptor 2. Parentheses indicate 95% confidence intervals.
