# Supplementary material for: A Radiomics-Based Model for Potentially More Accurate Identification of Subtypes of Breast Cancer Brain Metastases
Source: PubMed Central journal article supplement — Yonsei Med J. 2023 Aug 18;64(9):573–80. doi: 10.3349/ymj.2023.0047 (PMC10462808; doi:10.3349/ymj.2023.0047), 2023-08-18
Supplement: ymj-64-573-s002.pdf [file ymj-64-573-s002.pdf]

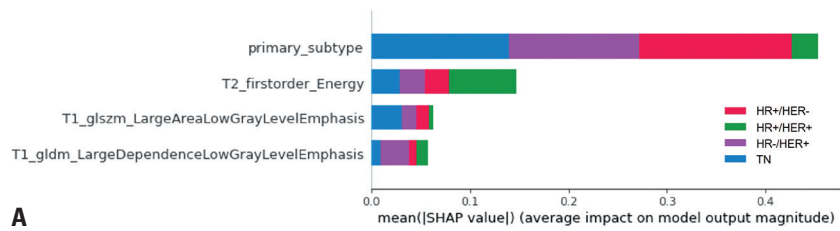

**A**

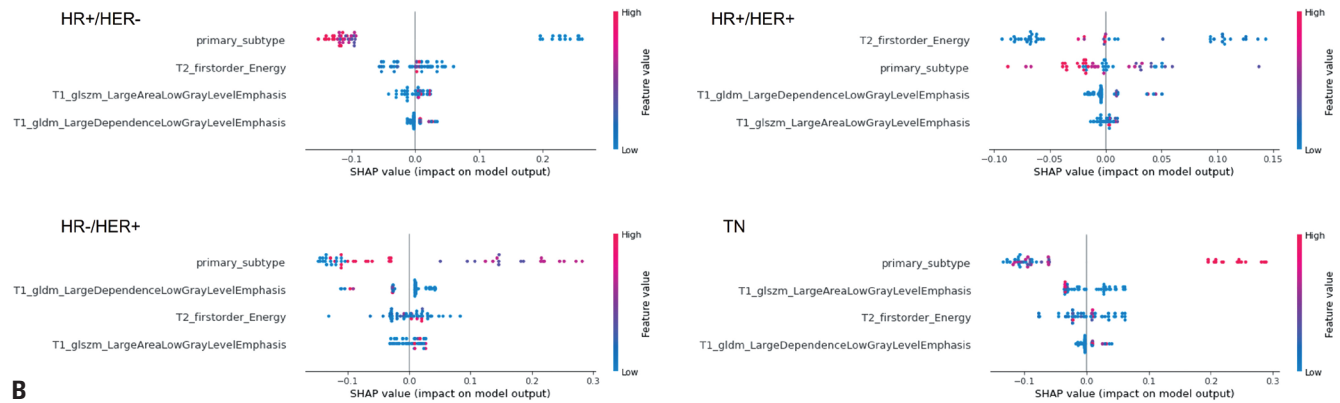

**B**

**Supplementary Fig. 1.** Variance importance plot (A) and summary plots for each prediction (B) in the external validation set.
